# Supplementary material for: Risk factors of complications after thermal ablation for hepatocellular carcinoma: the role of assessment of liver background
Source: PubMed Central journal article supplement — Eur J Gastroenterol Hepatol. 2024 Oct 31;37(1):106–13. doi: 10.1097/MEG.0000000000002879 (PMC11608584; doi:10.1097/meg.0000000000002879), 2024-10-31
Supplement: ejgh-37-106-s001.pdf [file ejgh-37-106-s001.pdf]

**Table S1. 11 items of real-time tissue elastography (RTE) images**

| Index | Definition                 | Contents                                                                                                                                                                                       |
|-------|----------------------------|------------------------------------------------------------------------------------------------------------------------------------------------------------------------------------------------|
| MEAN  | Average of relative strain | Average value of strain in the ROI classified in 256 scales from the average of strain                                                                                                         |
| SD    | Standard deviation         | Standard deviation of relative strain in the ROI                                                                                                                                               |
| AREA  | Area of blue parts         | Ratio of pixels of relative strain in the ROI which is lower than threshold=Pixels lower than threshold/Pixels in the ROI                                                                      |
| COMP  | Complexity                 | Divide relative strain in the ROI in 2 types to detect the blue parts. Calculate the complexity from the boundary length and area of blue parts. Complexity=boundary length <sup>2</sup> /Area |
| SKEW  | Skewness                   | Tertiary center moment. Used as a scale of asymmetry                                                                                                                                           |
| KURT  | Kurtosis                   | Quartic center moment. This value gets bigger when a part of value is far from others. If all values are near the average, this value gets smaller.                                            |
| CONT  | Contrast                   | This value gets bigger when matrix value is distributed far from main diagonal. In other words, it means big concentration difference,                                                         |
| ENT   | Equality                   | This value gets bigger when values are allotted equally.                                                                                                                                       |
| IDM   | Complication               | Measure Complication.                                                                                                                                                                          |
| ASM   | Uniformity                 | This value gets bigger when specific pairs of pixels exist a lot.                                                                                                                              |
| CORR  | Correlation                | This value gets the biggest when the value of matrix actor is distributed on main diagonal. Equality in $\sigma$ direction. Access the texture's direction.                                    |
